# Supplementary material for: Timing of Deep and REM Sleep Based on Fitbit Sleep Staging in Young Healthy Adults under Real-Life Conditions
Source: MDPI journal article supplement (doi:10.3390/brainsci14030260), 2024-03-06
Supplement: s1 [file s1]

(a)

**WD**

**FD**

| REM | Deep |      |      |       | Deep  |      |      |      |      |
|-----|------|------|------|-------|-------|------|------|------|------|
|     | 25   | 50   | 75   | 100   | 25    | 50   | 75   | 100  |      |
|     | 25   | 0.34 | 0.19 | -0.04 | -0.06 | 0.34 | 0.34 | 0.33 | 0.34 |
|     | 50   | 0.34 | 0.24 | -0.06 | -0.07 | 0.22 | 0.33 | 0.33 | 0.38 |
|     | 75   | 0.26 | 0.26 | -0.03 | 0.15  | 0.21 | 0.41 | 0.32 | 0.40 |
| 100 | 0.35 | 0.33 | 0.08 | 0.17  | 0.40  | 0.45 | 0.46 | 0.52 |      |

(b)

**WD**

**FD**

| REM | Deep |      |      |      | Deep |      |      |      |      |
|-----|------|------|------|------|------|------|------|------|------|
|     | 25   | 50   | 75   | 100  | 25   | 50   | 75   | 100  |      |
|     | 25   | 0.60 | 0.48 | 0.40 | 0.20 | 0.73 | 0.70 | 0.68 | 0.40 |
|     | 50   | 0.60 | 0.46 | 0.35 | 0.16 | 0.63 | 0.63 | 0.55 | 0.37 |
|     | 75   | 0.54 | 0.46 | 0.36 | 0.31 | 0.69 | 0.72 | 0.55 | 0.45 |
| 100 | 0.38 | 0.44 | 0.38 | 0.32 | 0.63 | 0.60 | 0.52 | 0.49 |      |
