# Supplementary material for: Timing of Deep and REM Sleep Based on Fitbit Sleep Staging in Young Healthy Adults under Real-Life Conditions
Source: Brain Sci. 2024 Mar 6;14(3):260. doi: 10.3390/brainsci14030260 (PMC10968898; doi:10.3390/brainsci14030260)
Supplement: Supplementary file 1 [file brainsci-14-00260-s001.zip]

Archive with 5 entries (5 files):
- Supplementary figure captions.pdf
- Supplementary figure S1.tif
- Supplementary figure S2.pdf
- Supplementary figure S3.jpg
- Supplementary figure S4.jpg
